# Supplementary material for: A Pyranose-2-Phosphate Motif Is Responsible for Both Antibiotic Import and Quorum-Sensing Regulation in Agrobacterium tumefaciens
Source: PubMed Central journal article supplement (PMC4526662; doi:10.1371/journal.ppat.1005071), 2015-08-05
Supplement: ppat.1005071.s002.pdf [file ppat.1005071.s002.pdf]

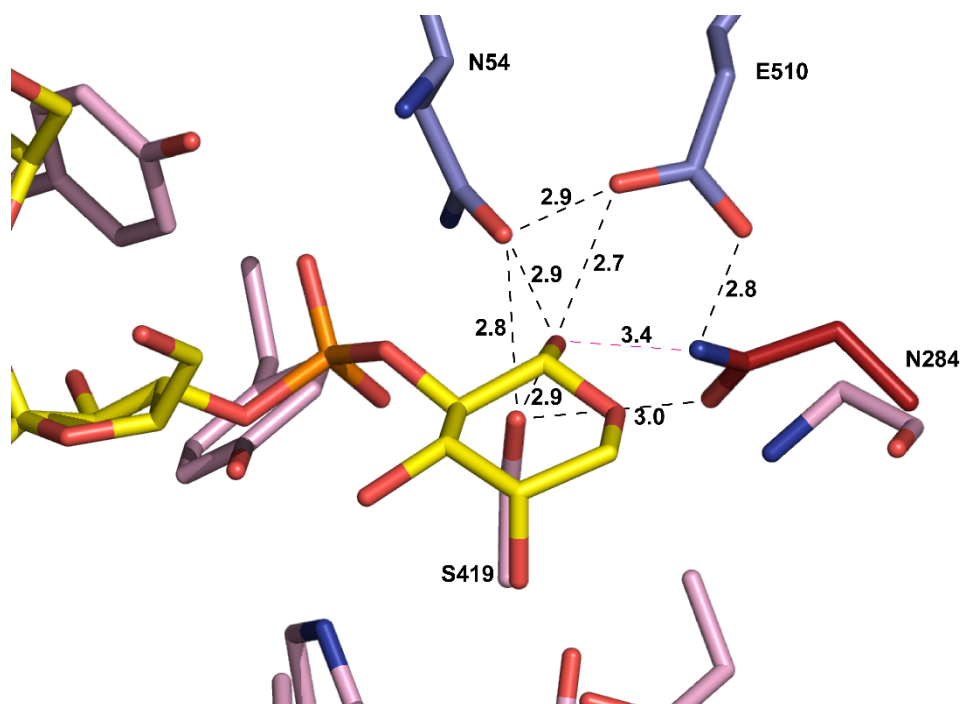

**S2a Fig** Stick representation of AccA residues interacting with arabinose O1H group in agrocinopine A (in yellow). Residues from the lobe 1, lobe 2 and hinge region are shown in slate, pink and red, respectively.

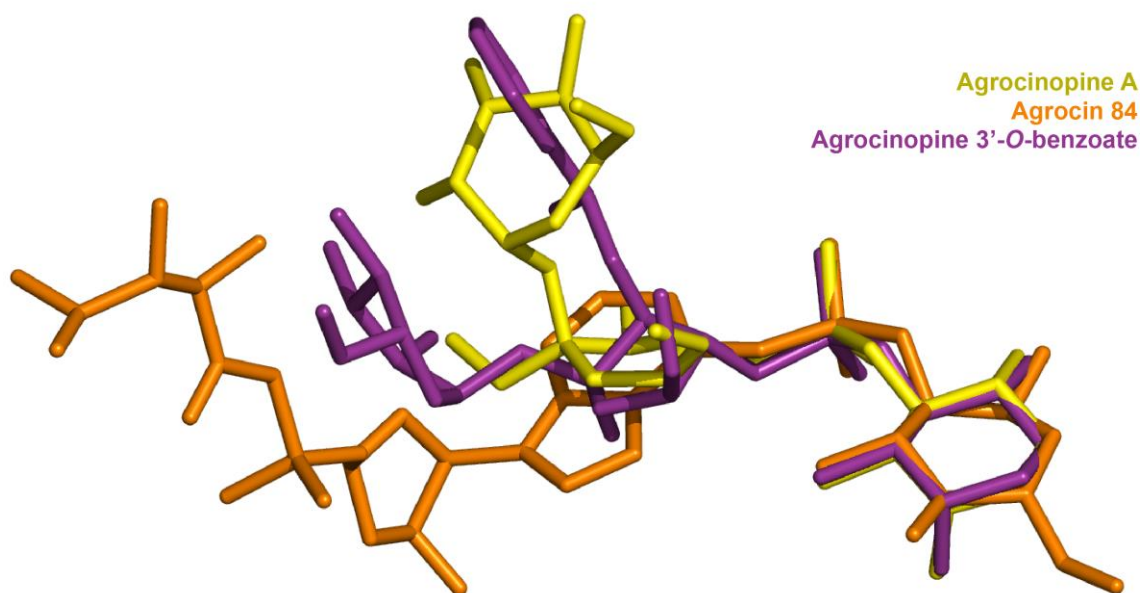

**S2b Fig** Superimposition of three bound ligands: agrocinopine A (yellow), agrocin 84 (orange), agrocinopine 3'-O-benzoate (purple) are shown as stick.
