# Supplementary material for: A Pyranose-2-Phosphate Motif Is Responsible for Both Antibiotic Import and Quorum-Sensing Regulation in Agrobacterium tumefaciens
Source: PubMed Central journal article supplement (PMC4526662; doi:10.1371/journal.ppat.1005071), 2015-08-05
Supplement: ppat.1005071.s006.pdf [file ppat.1005071.s006.pdf]

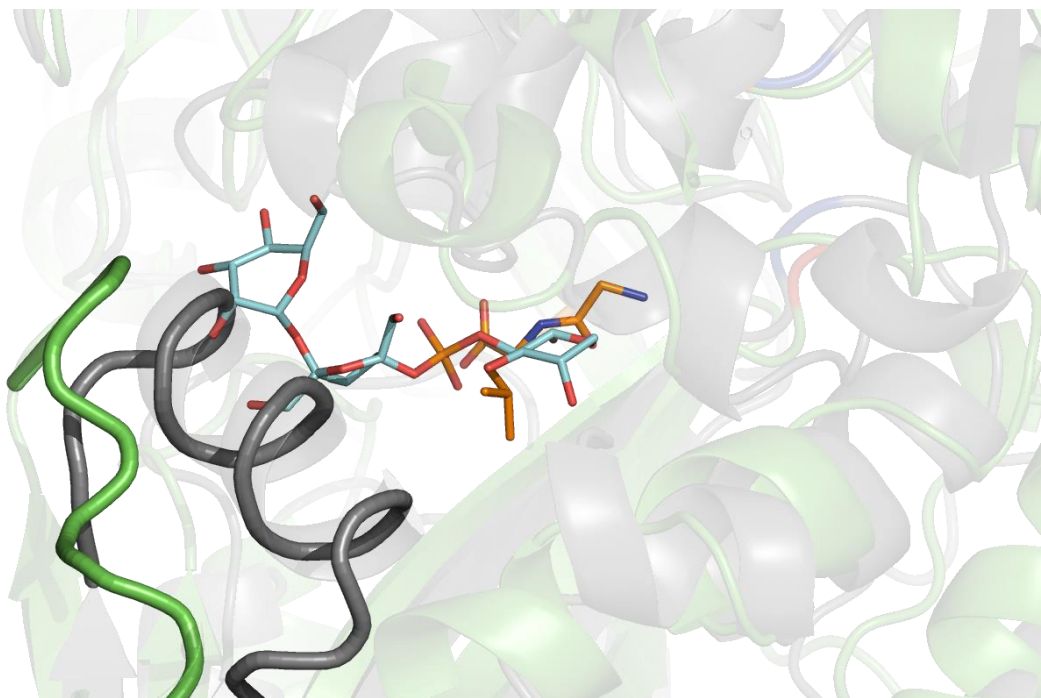

**S6a Fig** Structural comparison of the ligand binding site between AccA (grey)-Agrocinopine A and DPP (green)-GL complexes. Agrocinopine A and GL are shown in cyan and orange, respectively. The loop region 402-414 in AccA shown in green corresponds to the helix 383-399 in DPP shown in grey.

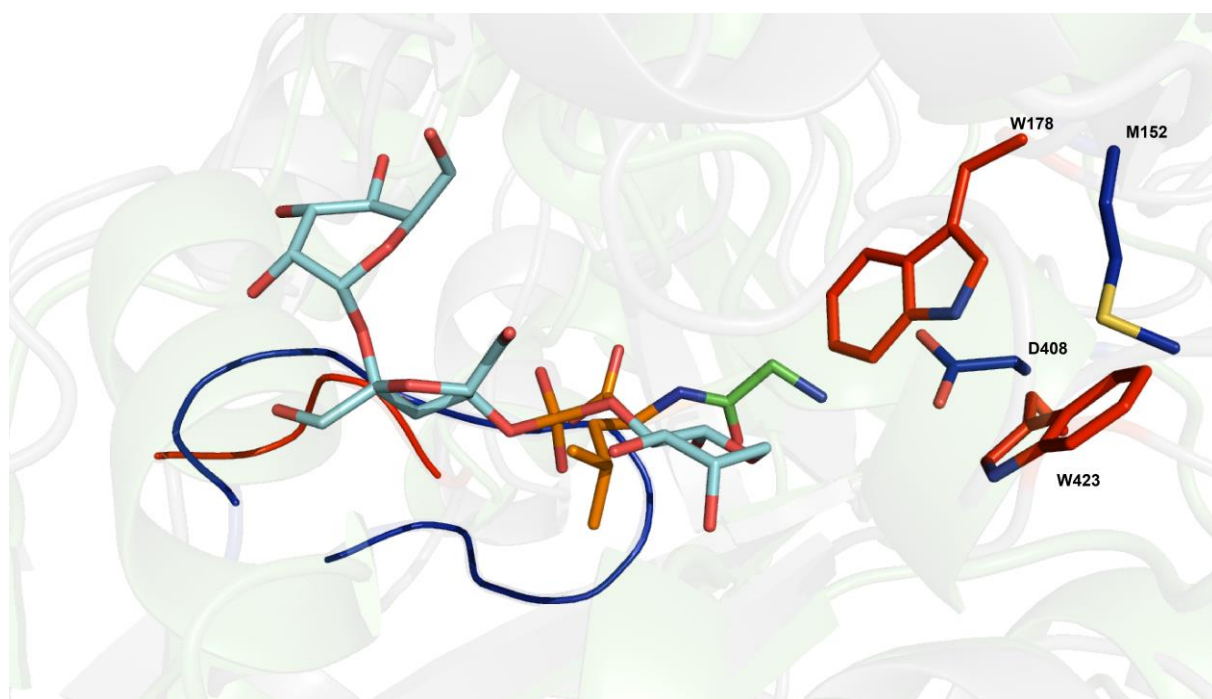

**S6b Fig** Structural comparison of the ligand binding site between AccA (grey)-Agrocinopine A and DPP (green)-GL complexes. Agrocinopine A and GL are shown in cyan and orange, respectively. The two tryptophans gate (Trp178 and Trp423) and the loop 372-378 from AccA are represented in red while the corresponding residues (Met152 and Asp408) and the loop 351-359 in DPP are in deep blue.
