# Supplementary material for: A Pyranose-2-Phosphate Motif Is Responsible for Both Antibiotic Import and Quorum-Sensing Regulation in Agrobacterium tumefaciens
Source: PubMed Central journal article supplement (PMC4526662; doi:10.1371/journal.ppat.1005071), 2015-08-05
Supplement: ppat.1005071.s008.pdf [file ppat.1005071.s008.pdf]

|                  | Agrocinopine A  | Agrocin 84 | Agrocinopine<br>3'- <i>O</i> -benzoate | L-Arabinose-2-<br>isopropylphosphate | L-Arabinose-2-<br>phosphate | D-Glucose-2-<br>phosphate |
|------------------|-----------------|------------|----------------------------------------|--------------------------------------|-----------------------------|---------------------------|
| $K_D$ ( $\mu$ M) | 1.32 $\pm$ 0.17 | ND         | 5.88 $\pm$ 1.6                         | 4.79 $\pm$ 0.63                      | 2.93 $\pm$ 0.66             | 2.50 $\pm$ 0.5            |

**S1 Table** Autofluorescence affinity results. The  $K_D$  values were obtained using Microcal Origin. and fitting to a one binding site model using the following equation:  $f = \Delta \text{Fluorescence}_{\text{max}} * \text{abs}(x) / (K_D + \text{abs}(x))$ . ND: no signal detected.
