# Supplementary material for: A Pyranose-2-Phosphate Motif Is Responsible for Both Antibiotic Import and Quorum-Sensing Regulation in Agrobacterium tumefaciens
Source: PubMed Central journal article supplement (PMC4526662; doi:10.1371/journal.ppat.1005071), 2015-08-05
Supplement: ppat.1005071.s009.pdf [file ppat.1005071.s009.pdf]

|                          | Agrocinopine A     | Agrocin 84          | Agrocinopine<br>3'- <i>O</i> -benzoate | L-Arabinose-2-<br>isopropylphosphate | L-Arabinose-2-<br>phosphate | D-glucose-2-<br>phosphate |
|--------------------------|--------------------|---------------------|----------------------------------------|--------------------------------------|-----------------------------|---------------------------|
| $K_D$ ( $\mu$ M)         | 0.3 $\pm$ 0.03     | 1.5 $\pm$ 0.41      | 7.5 $\pm$ 2.2                          | 2.2 $\pm$ 0.58                       | 1.33 $\pm$ 0.12             | 1.16 $\pm$ 0.22           |
| N                        | 1 $\pm$ 0.006      | 0.8 $\pm$ 0.043     | 0.99 $\pm$ 0.06                        | 1.08 $\pm$ 0.03                      | 0.95 $\pm$ 0.01             | 0.970 $\pm$ 0,01          |
| K                        | 2.99E6 $\pm$ 2.9E5 | 6.83E5 $\pm$ 1.8E5  | 1.33E5 $\pm$<br>3.61E4                 | 4.72E5 $\pm$ 1.2E5                   | 7.54E5 $\pm$ 6.5E4          | 8,61E5 $\pm$ 1,6          |
| $\Delta H$ (cal/mol)     | -1.12E4 $\pm$ 98   | -4.37E4 $\pm$ 3.8E3 | -3.7E3 $\pm$ 374                       | -1.56E4 $\pm$ 493                    | -1.11E4 $\pm$ 168           | -4.5E3 $\pm$ 123          |
| T $\Delta S$ (cal/mol/K) | -2.6E3 $\pm$       | -3.6E4              | 3.2E3                                  | -8E3                                 | -3.2E3                      | -2.9E3                    |
| $\Delta G$ (cal/mol)     | -8.6E3             | -7.7E3              | -6.9E3                                 | -7.6E3                               | -7.9E3                      | -7.4E3                    |

**S2 Table** Microcalorimetry results. The values were obtained using Microcal Origin. and fitting to a one binding site model. No signal detected for L-arabinose and D-glucose.
